# Supplementary material
Source: Springer Nature journal article supplement (https://www.springermedizin.de/resource/supplementary/12885_2009_1887_MOESM1_ESM.pdf/9461494)

**A****p53**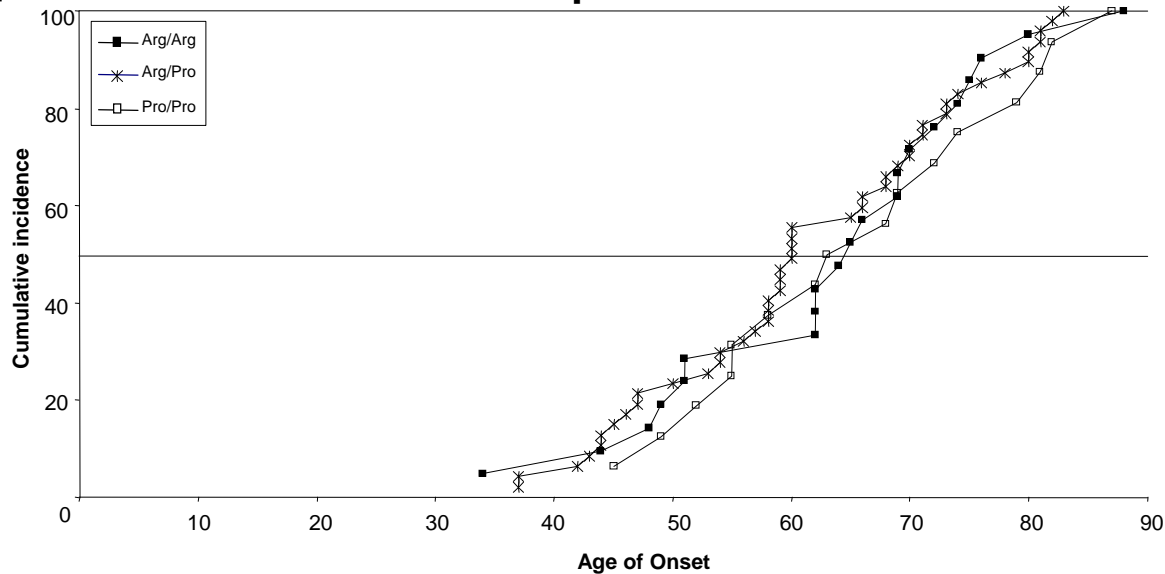**B****MDM2**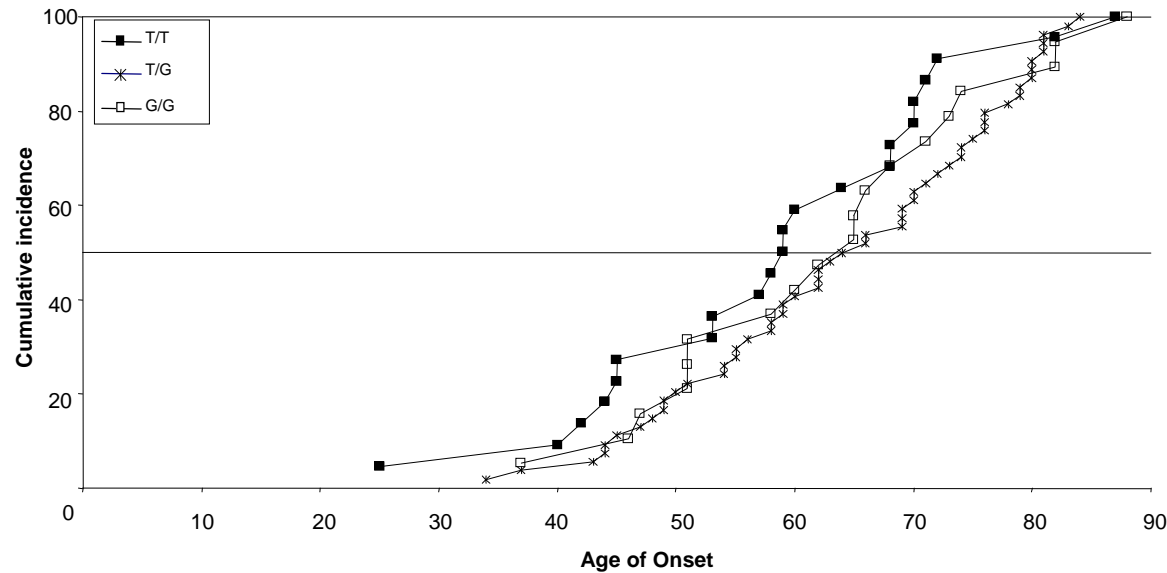

Supplement: MOESM1 [file 9461494]
